# Supplementary material for: Quantitative analysis of tumor perfusion via contrast-enhanced ultrasound to predict the neoadjuvant chemotherapy efficacy for children with hepatoblastoma
Source: Research Square preprint supplement (doi:10.21203/rs.3.rs-5988488/v1), 2025-02-14
Supplement: Supplementary file 1 [file 0c909c4cbafb558921a6d099.docx]

Table S1 The ICC of intra-observer quantification

| Parameter | Entire tumor | Active area of tumor | Surrounding liver parenchyma |
| --- | --- | --- | --- |
| MeanLin | 0.995 | 0.996 | 0.803 |
| PE | 0.997 | 0.995 | 0.912 |
| WiAUC | 0.988 | 0.991 | 0.912 |
| RT | 0.933 | 0.908 | 0.824 |
| mTTI | 0.724 | 0.734 | 0.620 |
| TTP | 0.936 | 0.916 | 0.843 |
| WiR | 0.998 | 0.996 | 0.961 |
| WiPI | 0.997 | 0.995 | 0.911 |
| WoAUC | 0.977 | 0.986 | 0.847 |
| WiWoAUC | 0.981 | 0.988 | 0.871 |
| FT | 0.900 | 0.890 | 0.721 |
| WoR | 0.999 | 0.998 | 0.969 |

ICC, Intra-class correlation coefficient; MeanLin, average contrast signal intensity; PE, peak enhancement; RT, rising time; FT, fall time; TTP, time to peak; mTTI, mean transit time; WiAUC, wash-in area under the curve; WiR, wash-in rate; WiPI, wash-in perfusion index; WoAUC, wash-out area under the curve; WoR, wash-out rate; WiWoAUC, wash-in area and wash-out area under the curve
