# Supplementary material for: Quantitative analysis of tumor perfusion via contrast-enhanced ultrasound to predict the neoadjuvant chemotherapy efficacy for children with hepatoblastoma
Source: Research Square preprint supplement (doi:10.21203/rs.3.rs-5988488/v1), 2025-02-14
Supplement: Supplementary file 2 [file 8294c800f45465ca8867c8d1.docx]

Table S2 Contrast-enhanced ultrasound quantitative parameters of the two groups (tumor ROI: active area of tumor)

| Parameter | Responder group (n=16) | Non-responder group (n=19) | *p* value |
| --- | --- | --- | --- |
| MeanLin ratio | 1.7 (1.1-2.5) | 0.8 (0.5-1.0) | 0.001 |
| PE ratio | 1.9 (1.1-3.1) | 0.9 (0.7-1.4) | 0.004 |
| WiAUC ratio | 1.3 (0.7-1.9) | 0.6 (0.3-1.2) | 0.005 |
| RT ratio | 0.6 (0.5-0.8) | 0.7 (0.4-0.9) | 0.99 |
| mTTI ratio | 0.7 (0.3-1.2) | 0.8 (0.6-2.0) | 0.15 |
| TTP ratio | 0.6 (0.5-0.8) | 0.6 (0.4-1.0) | 0.81 |
| WiR ratio | 3.1 (1.7-6.9) | 1.4 (1.1-3.0) | 0.04 |
| WiPI ratio | 2.0 (1.1-3.1) | 0.9 (0.7-1.4) | 0.003 |
| WoAUC ratio | 1.3 (0.9-2.3) | 0.7 (0.3-1.1) | 0.005 |
| WiWoAUC ratio | 1.3 (0.9-2.1) | 0.7 (0.3-1.1) | 0.003 |
| FT ratio | 0.7 (0.5-0.9) | 0.6 (0.4-1.1) | 0.64 |
| WoR ratio | 1.8 (1.3-7.5) | 1.5 (1.2-2.4) | 0.22 |

MeanLin, average contrast signal intensity; PE, peak enhancement; RT, rising time; FT, fall time; TTP, time to peak; mTTI, mean transit time; WiAUC, wash-in area under the curve; WiR, wash-in rate; WiPI, wash-in perfusion index; WoAUC, wash-out area under the curve; WoR, wash-out rate; WiWoAUC, wash-in area and wash-out area under the curve
